# Supplementary material
Source: publisher figshare collection journal article supplement (https://acs.figshare.com/ndownloader/files/4616203)
Supplement: Supplementary file 1 [file 4616203]

# Supporting Information

## Biphasic hydrogenation over PVP stabilized Rh nanoparticles in hydroxyl functionalized ionic liquids

Xue Yang,<sup>1,2</sup> Ning Yan,<sup>1,3</sup> Zhaofu Fei,<sup>1</sup> R. Micaela Crespo-Quesada,<sup>1</sup> Gábor Laurenczy,<sup>1</sup> Liubov Kiwi-Minsker,<sup>1</sup> Yuan Kou,<sup>3</sup> Yongdan Li<sup>2</sup> and Paul J. Dyson.<sup>1\*</sup>

*1 Institut des Sciences et Ingénierie Chimiques, Ecole Polytechnique Fédérale de Lausanne (EPFL), CH 1015 Lausanne, Switzerland.*

*2Tianjin Key Laboratory of Catalysis Science and Technology and State Key Laboratory for Chemical Engineering (Tianjin University), School of Chemical Engineering, Tianjin University, Tianjin 300072, China*

*3. PKU Green Chemistry Center, Beijing National Laboratory for Molecular Sciences, College of Chemistry and Molecular Engineering, Peking University, Beijing 100871, P. R. China.*

Email address: paul.dyson@epfl.ch

### Experimental

**General Method.** Preparation of hydroxyl-functionalized ionic liquids, including 1-(2-hydroxyethyl)-3-methyl imidazolium based ILs, 1-(2-hydroxyethyl)-3-methyl pyridinium based ILs, and 1-(2-hydroxyethyl)-1-methyl piperidinium based ILs, were prepared through a classical two step protocol. Rhodium nanoparticles were prepared by reduction in ethanol/water using polyvinylpyrrolidone (PVP) as stabilizer according to a literature method.<sup>1</sup> Analytical rhodium standard solution, sodium tetrafluoroborate, sodium hexafluorophosphate, lithium bis(trifluoromethylsulfonyl)amide, 2-bromoethanol, 3-picoline, N-methylpiperidine and PVP were purchased from Aldrich and used as received. NMR spectra were obtained at 20°C with a Bruker DMX 400 instrument. GC analyses were conducted on a Varian Chrompack CP-3380 equipped with a capillary column (25 m x 0.25 mm, using N<sub>2</sub> as carrier gas). IR spectra were recorded on a Perkin-Elmer FT-IR 2000 system. TEM images were obtained on a PHILLIPS CM 20 transmission electron microscope. Elemental analysis of rhodium was carried out on a Perkin-Elmer Optima

2000 ICP-OES spectrometer. Intensities of spectral of all samples and standards were measured at 343.489 nm and analysis repeated three times. The rhodium level in the samples was determined by comparison with the standard of rhodium solutions with known concentrations.

**General procedure for synthesis of 3-(2-hydroxyethyl)-1-methyl imidazolium bromide [C<sub>2</sub>OHmim]Br, 1-(2-hydroxyethyl)-3-methyl pyridinium bromide [C<sub>2</sub>OHmpy]Br and 1-(2-hydroxyethyl)-1-methyl piperidinium bromide [C<sub>2</sub>OHmpip]Br**

A mixture of 1-methylimidazole (20 ml, 20.6 g) and 2-bromoethanol (20 ml, 35.2 g) was stirred for 2 days at room temperature, during which time precipitation was observed. Diethyl ether (40 ml) was added into the mixture and vigorously stirred for 1 h. The precipitate was removed by filtration, washed with diethyl ether (3 × 40 ml) and the solid dried under vacuum for 24 h. The synthesis of [C<sub>2</sub>OHmpy]Br, [C<sub>2</sub>OHmpip]Br were conducted in a similar way.

[C<sub>2</sub>OHmim]Br: yield: 90% <sup>1</sup>H NMR (D<sub>2</sub>O)  $\delta$  = 8.62 (s, 1H), 7.40 (s, 1H), 7.35 (s, 1H), 4.21 (t, J (H, H) = 4.8 Hz, 2H), 3.80-3.83 (m, 5H).

[C<sub>2</sub>OHmpy]Br: yield: 85% <sup>1</sup>H NMR (D<sub>2</sub>O)  $\delta$  = 8.58 (s, 1H), 8.53 (d, J (H, H) = 8.0 Hz, 1H), 8.28 (d, J (H, H) = 8.0 Hz 1H), 7.83 (t, J (H, H) = 8.0 Hz, 1H), 4.55 (t, J (H, H) = 4.8 Hz, 2H), 3.94 (t, J (H, H) = 4.8 Hz, 2H), 2.43 (s, 3H). <sup>13</sup>C NMR (D<sub>2</sub>O)  $\delta$  = 146.5, 144.2, 141.8, 139.8, 127.4, 63.3, 60.4, 17.8.

[C<sub>2</sub>OHmpip]Br: yield: 78% <sup>1</sup>H NMR (D<sub>2</sub>O)  $\delta$  = 3.94 (br, 2H), 3.41 (t, J (H, H) = 4.8 Hz, 2H), 3.24-3.38 (m, 4H), 3.02 (s, 3H), 1.78 (br, 4H), 1.52-1.59 (m, 2H). <sup>13</sup>C NMR (D<sub>2</sub>O)  $\delta$  = 64.3, 62.3, 55.2, 49.0, 20.6, 19.7.

**Synthesis of ILs 3-(2-hydroxyethyl)-1-methyl imidazolium tetrafluoroborate [C<sub>2</sub>OHmim][BF<sub>4</sub>], 1-(2-hydroxyethyl)-3-methyl pyridinium tetrafluoroborate [C<sub>2</sub>OHmpy][BF<sub>4</sub>], 1-(2-hydroxyethyl)-1-methyl piperidinium tetrafluoroborate [C<sub>2</sub>OHmpip][BF<sub>4</sub>], 3-(2-hydroxyethyl)-1-methyl imidazolium hexafluorophosphate [C<sub>2</sub>OHmim][PF<sub>6</sub>] and 3-(2-hydroxyethyl)-1-methyl**

**imidazolium bis(trifluoromethylsulfonyl)amide [C<sub>2</sub>OHmim][Tf<sub>2</sub>N] (Figure S1)**

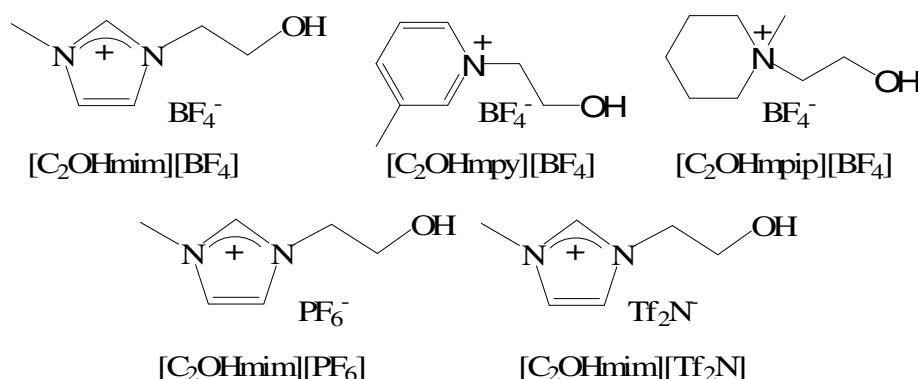

**Figure S1:** 5 Hydroxyl group functionalized ionic liquids synthesized.

[C<sub>2</sub>OHmim][BF<sub>4</sub>], [C<sub>2</sub>OHmim][PF<sub>6</sub>] have been reported before and the ILs described here were synthesized using the modified literature method.<sup>2</sup>

[C<sub>2</sub>OHmim]Br (0.1 mol, 20.7 g) was dissolved in dry acetone and sodium tetrafluoroborate (0.1 mol, 11.0 g) (sodium hexafluorophosphate 0.1 mol, 16.8 g for [C<sub>2</sub>OHmim][PF<sub>6</sub>]) was added. The mixture was stirred for 3 days at 60°C. After filtration, the solvent was removed under vacuum. The product was further purified on a short alumina column (for [C<sub>2</sub>OHmim][BF<sub>4</sub>], [C<sub>2</sub>OHmpy][BF<sub>4</sub>], [C<sub>2</sub>OHmpip][BF<sub>4</sub>] using acetonitrile as eluent, for [C<sub>2</sub>OHmim][PF<sub>6</sub>] using MeOH:CH<sub>2</sub>Cl<sub>2</sub>, 1:2 as eluent). [C<sub>2</sub>OHmpy][BF<sub>4</sub>], [C<sub>2</sub>OHmpip][BF<sub>4</sub>] and [C<sub>2</sub>OHmim][PF<sub>6</sub>] were synthesized similarly.

[C<sub>2</sub>OHmim][BF<sub>4</sub>]: yield 52%, <sup>1</sup>H NMR (D<sub>2</sub>O) δ = 8.73 (s, 1H), 7.57 (s, 1H), 7.51 (s, 1H), 4.38 (t, J (H, H) = 4.8 Hz, 2H), 3.92-4.00 (m, 5H). <sup>13</sup>C NMR (D<sub>2</sub>O) δ = 136.5, 123.8, 122.6, 60.2, 51.7, 35.8. <sup>19</sup>F NMR (D<sub>2</sub>O) δ = -150.6 (s).

[C<sub>2</sub>OHmpy][BF<sub>4</sub>]: yield 63%, <sup>1</sup>H NMR (CD<sub>3</sub>CN) δ = 8.62 (s, 1H), 8.58 (d, J (H, H) = 8.0 Hz, 1H), 8.47 (d, J (H, H) = 8.0 Hz, 1H), 7.94 (t, J (H, H) = 8.0 Hz, 1H), 4.57 (t, J (H, H) = 4.8 Hz, 2H), 3.96 (t, J (H, H) = 4.8 Hz, 2H), 3.39 (s, 1H), 2.55 (s, 3H). <sup>19</sup>F NMR (D<sub>2</sub>O) δ = -152.0 (s).

[C<sub>2</sub>OHmpip][BF<sub>4</sub>]: yield 65%, <sup>1</sup>H NMR (D<sub>2</sub>O) δ = 3.97 (br, 2H), 3.49 (t, J (H, H) = 4.8 Hz, 2H), 3.28-3.42 (m, 4H), 3.01 (s, 3H), 1.82 (br, 4H), 1.56-1.65 (m, 2H). <sup>19</sup>F NMR (D<sub>2</sub>O) δ = -151.2 (s).

[C<sub>2</sub>OHmim][PF<sub>6</sub>]: yield 72%, <sup>1</sup>H NMR (CD<sub>3</sub>CN)  $\delta$  = 8.59 (s, 1H), 7.43 (s, 1H), 7.36 (s, 1H), 4.24 (t, J (H, H) = 4.8 Hz, 2H), 3.86 (s, 3H), 3.82 (t, J (H, H) = 4.8 Hz, 2H). <sup>19</sup>F NMR (CD<sub>3</sub>CN)  $\delta$  = -73.3 (d, J (F-P) = 717.2 Hz). <sup>31</sup>P NMR (CD<sub>3</sub>CN)  $\delta$  = -144.6 (septet, J (P-F) = 717.2 Hz).

### Synthesis of [C<sub>2</sub>OHmim][Tf<sub>2</sub>N]

Li(N[SO<sub>2</sub>CF<sub>3</sub>]<sub>2</sub>) (0.05 mol, 14.4 g) was added to a solution of [C<sub>2</sub>OHmim]Br (0.05 mol, 10.2 g) in water (10 ml) at room temperature. The IL phase was separated and washed with water (3  $\times$  5 ml) and dried under vacuum overnight. Yield 70 %, <sup>1</sup>H NMR (CD<sub>3</sub>CN)  $\delta$  = 8.50 (s, 1H), 7.43 (s, 1H), 7.37 (s, 1H), 4.23 (t, J (H, H) = 4.8 Hz, 2H), 3.87 (s, 3H) 3.83 (t, J (H, H) = 4.8 Hz, 2H). <sup>13</sup>C NMR (CD<sub>3</sub>CN)  $\delta$  = 136.3, 123.4, 122.8, 120.0 (q, J (C-F) = 318.6 Hz) 60.2, 51.7, 35.8. <sup>19</sup>F NMR (CD<sub>3</sub>CN)  $\delta$  = -80.6 (s).

### Solubility test of PVP in [C<sub>2</sub>OHmim][BF<sub>4</sub>] and [C<sub>2</sub>mim][BF<sub>4</sub>]

5 g [C<sub>2</sub>OHmim][BF<sub>4</sub>] and [C<sub>2</sub>mim][BF<sub>4</sub>] were located in two 10 ml flasks and dried under vacuum at 60 °C prior to use. A known amount (for [C<sub>2</sub>mim][BF<sub>4</sub>], 25 mg was used and for [C<sub>2</sub>OHmim][BF<sub>4</sub>], 50 mg was used) of PVP (MW: 58000) was then added to each ionic liquid with stirring at 60 °C. After 1 h, [C<sub>2</sub>mim][BF<sub>4</sub>] solution still looked cloudy with white PVP powder sticking on the surface of the flask while [C<sub>2</sub>OHmim][BF<sub>4</sub>] forms a clear and homogenous solution. Another 50 mg PVP was then added into [C<sub>2</sub>OHmim][BF<sub>4</sub>] and it became clear again within 30 min. After 5 times adding, the solution remains clear and homogenous. The solution was cooled to r.t. and no change of the solution can be observed. Thus, the solubility of PVP in [C<sub>2</sub>OHmim][BF<sub>4</sub>] is at least 5% (Figure S3).

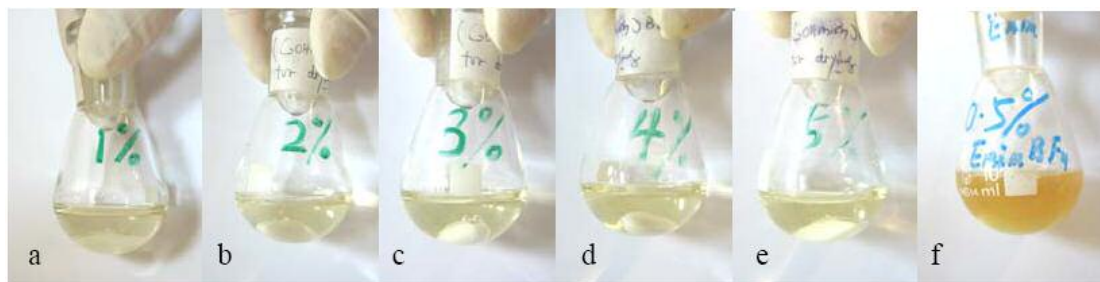

**Figure S3:** PVP solution in  $[C_2OHmim][BF_4]$  (a-e) and  $[C_2mim][BF_4]$  (f).

### Preparation of Rh nanoparticles

$RhCl_3 \cdot xH_2O$  (0.5 mmol, 120 mg) was dissolved in a mixture of ethanol (80 ml) and water (20 ml) and PVP was added (550 mg, for recycling experiment 1.1 g was used, average MW: 58000). The mixture was refluxed for 2 h during which time the color of the solution changes from orange to black. The resulting Rh nanoparticle solution was kept at ambient temperature for further use.

### Preparation of PVP-Rh- $[C_2OHmim][BF_4]$ system

A stock solution rhodium nanoparticles (10 ml) was added to  $[C_2OHmim][BF_4]$  (20 ml). The ethanol and water were removed under reduced pressure on a rotary evaporator, followed by azeotropic evaporation with dried ethanol three times ( $3 \times 40$  ml). Other PVP-Rh-functionalized IL systems were prepared in a similar manner (pictures are shown in Figure S2).

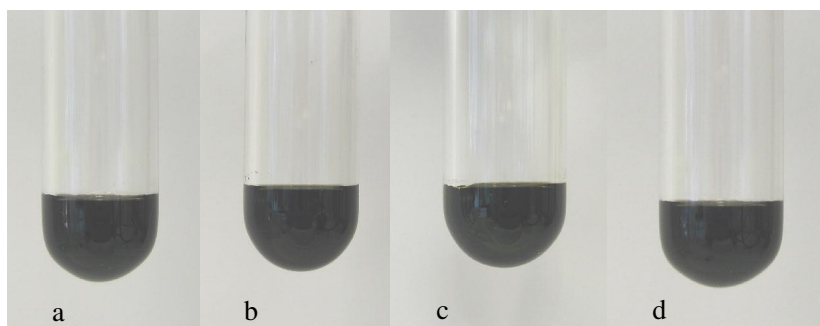

**Figure S3:** Rh nanoparticles immobilized in (a)  $[C_2OHmim][PF_6]$ , (b)  $[C_2OHmim][Tf_2N]$ , (c)  $[C_2OHmpy][BF_4]$  and (d)  $[C_2OHmpip][BF_4]$ .

### Catalytic hydrogenation procedures

All hydrogenation reactions were conducted in a home-built multicell autoclave containing an internal temperature probe. Glass reactor vessels were charged with 5 mmol (S to C = 2000) or 10 mmol (S to C = 4000), IL (1 ml) containing  $2.5 \times 10^{-3}$  M rhodium nanoparticles and octane (0.1 ml) as internal standard. The autoclave was purged with  $H_2$  ( $3 \times 10$  bar), pressurized with  $H_2$  (50 bar) and then heated to 40 °C. After 2 h, reactions were stopped and autoclave was cooled to ambient temperature using an external water-cooling system and the pressure was then released. Conversions were determined by GC analysis of the upper organic phase. Recycling experiments were carried out as follows: after reaction, the upper layer (mainly ethyl benzene) and IL phase were separated by decantation. Then, hexane (3 x 2 ml) was used to extract the IL phase thoroughly. Finally, the IL phase was maintained under vacuum for 12 h.

**Table S1:** Recycling experiments for the hydrogenation of styrene in  $[C_2OHmim][BF_4]$  and  $[C_2mim][BF_4]$ .

| Entry | ILs                          | Yields (%)   |                  |
|-------|------------------------------|--------------|------------------|
|       |                              | ethylbenzene | ethylcyclohexane |
| 1     | $[C_2OHmim][BF_4]$ (batch 1) | 99.8         | 0.2              |
| 2     | $[C_2OHmim][BF_4]$ (batch 2) | 99.8         | 0.2              |
| 3     | $[C_2OHmim][BF_4]$ batch 3)  | 99.7         | 0.3              |
| 4     | $[C_2OHmim][BF_4]$ batch 4)  | 99.6         | 0.4              |
| 5     | $[C_2OHmim][BF_4]$ (batch 5) | 99.4         | 0.6              |
| 6     | $[C_2OHmim][BF_4]$ (batch 6) | 99.2         | 0.8              |
| 7     | $[C_2OHmim][BF_4]$ (batch 7) | 99.4         | 0.6              |
| 8     | $[C_2OHmim][BF_4]$ (batch 8) | 94.4         | 0.1              |
| 9     | $[C_2OHmim][BF_4]$ (batch 9) | 89.5         | 0.1              |
| 10    | $[C_2mim][BF_4]$ (batch 1)   | 21.5         | 0                |
| 11    | $[C_2mim][BF_4]$ (batch 2)   | 20.0         | 0                |
| 12    | $[C_2mim][BF_4]$ (batch 3)   | 14.8         | 0                |

|    |                                                  |      |   |
|----|--------------------------------------------------|------|---|
| 13 | [C <sub>2</sub> mim][BF <sub>4</sub> ] (batch 4) | 21.1 | 0 |
| 14 | [C <sub>2</sub> mim][BF <sub>4</sub> ] (batch 5) | 11.5 | 0 |

a Conditions:  $2.5 \times 10^{-3}$  mmol of Rh nanoparticles (Rh:PVP = 1:20) in [C<sub>2</sub>OHmim][BF<sub>4</sub>] (1 ml) or [C<sub>2</sub>mim][BF<sub>4</sub>] (1 ml), cat:sub = 4000:1, H<sub>2</sub> (50 bar) and at 40 ° C for 2 h.. Conversion determined by GC.

### **H<sub>2</sub> solubility in [C<sub>2</sub>OHmim][BF<sub>4</sub>]**

[C<sub>2</sub>OHmim][BF<sub>4</sub>] (2.5 ml) was sealed in a sapphire NMR tube at a pressure of 100 atm H<sub>2</sub>. After vigorous shaking for 4 h, a <sup>1</sup>H NMR spectrum of the solution was recorded on a 360 MHz Bruker NMR instrument. The <sup>1</sup>H NMR spectrum was fitted with WINNMR and NMRICMA2.8/MATALAB programs (nonlinear least squares fit, minimizing the difference between the measured and calculated spectra to determine the spectral parameters and integrals). The Henry's constant for H<sub>2</sub> was found to be  $1.43 \times 10^{-3}$ /MPa and the hydrogen concentration 0.47 mM at 1 atm (for [C<sub>4</sub>mim][BF<sub>4</sub>], the value is 0.86 mM).<sup>3</sup>

### **Determination of leaching of PVP-Rh-[C<sub>2</sub>OHmim][BF<sub>4</sub>] and PVP-Rh-[C<sub>2</sub>mim][BF<sub>4</sub>] into organic solvents**

PVP-Rh-[C<sub>2</sub>OHmim][BF<sub>4</sub>] or PVP-Rh-[C<sub>2</sub>mim][BF<sub>4</sub>] (1 ml) was dried at 70 °C under vacuum for 12 h. After cooled to 25 °C, 1 ml of organic solvent (hexane, diethyl ether, ethyl acetate, dichloromethane and chloroform) were added into the IL and stirred vigorously for 2 h and then kept still for another 2 h. A known amount of organic phase (0.4-0.6 ml) was then removed, dried under vacuum and the residue was dissolved in CD<sub>3</sub>CN containing styrene (10 µL) as internal standard. The amount of IL was obtained by a comparison of the NMR integration of 2-H from imidazolium ring (8.49 ppm for [C<sub>2</sub>OHmim][BF<sub>4</sub>] and 8.40 ppm for [C<sub>2</sub>mim][BF<sub>4</sub>]) and one of the protons from the double bond in styrene (5.2 ppm).

**Table S2:** Solubility of [C<sub>2</sub>mim][BF<sub>4</sub>] and [C<sub>2</sub>OHmim][BF<sub>4</sub>] in organic solvents (10<sup>3</sup> M) at 25 °C.

| ILs \ Ext.                               | CH <sub>2</sub> Cl <sub>2</sub> | CHCl <sub>3</sub> | Ethyl acetate | Diethyl ether  | n-C <sub>6</sub> H <sub>14</sub> |
|------------------------------------------|---------------------------------|-------------------|---------------|----------------|----------------------------------|
| [C <sub>2</sub> mim][BF <sub>4</sub> ]   | Miscible                        | Miscible          | 6.0           | 0.16           | - <sup>a</sup>                   |
| [C <sub>2</sub> OHmim][BF <sub>4</sub> ] | 9.1                             | 3.9               | 2.3           | - <sup>a</sup> | - <sup>a</sup>                   |

a. Not detected.

### Catalyst leaching

After reaction, the upper layer (containing the product and unreacted substrate) as well as the hexane extracts (ca. 8 ml) were combined and the volatile components were removed under reduced pressure. The residue was digested by refluxing in a mixture of H<sub>2</sub>O<sub>2</sub>/HClO<sub>4</sub> for 4 h and then by refluxing in aqua regia for another 4 h. The solution was evaporated to ca. 1 ml, diluted with 2 % HNO<sub>3</sub> to 10 ml which was delivered to ICP analysis.

### TEM Sample Preparation

The Rh nanoparticle solution (0.05 ml) was diluted with deionized water (0.2 ml) and sonicated for 10 min. One drop of the solution was then deposited onto a carbon coated copper grid (500 mesh) and dried under vacuum for 12 h. The size distribution is based estimates from 100-200 particles.

### Characterization of polystyrene in PVP-Rh-[C<sub>2</sub>OHmim][BF<sub>4</sub>] after recycling

After nine batches the white material in PVP-Rh-[C<sub>2</sub>OHmim][BF<sub>4</sub>] (0.1 ml) was extracted using ethyl acetate (1 ml). The ethyl acetate phase was concentrated to about 0.1 ml and was transferred to a KBr window. After all organic solvent has evaporated and IR spectrum was recorded. The IR spectrum (Figure S3), shows peaks that belong to the IL (NMR leaching experiments also show ILs will be leached by ethyl acetate). By comparison to authentic samples, the characteristic peaks for polystyrene (PS) are present in the final extract, giving unambiguous evidence for the presence of PS after



reaction.

Peaks corresponding to PS ( $\text{cm}^{-1}$ ):

Sample from the reaction: 3082, 3059, 3025, 2924, 2853, 1945, 1872, 1802, 1601, 1492, 1452, 746, 697.

Authentic PS: 3082, 3059, 3025, 2922, 2850, 1946, 1870, 1804, 1601, 1492, 1452, 747, 697.

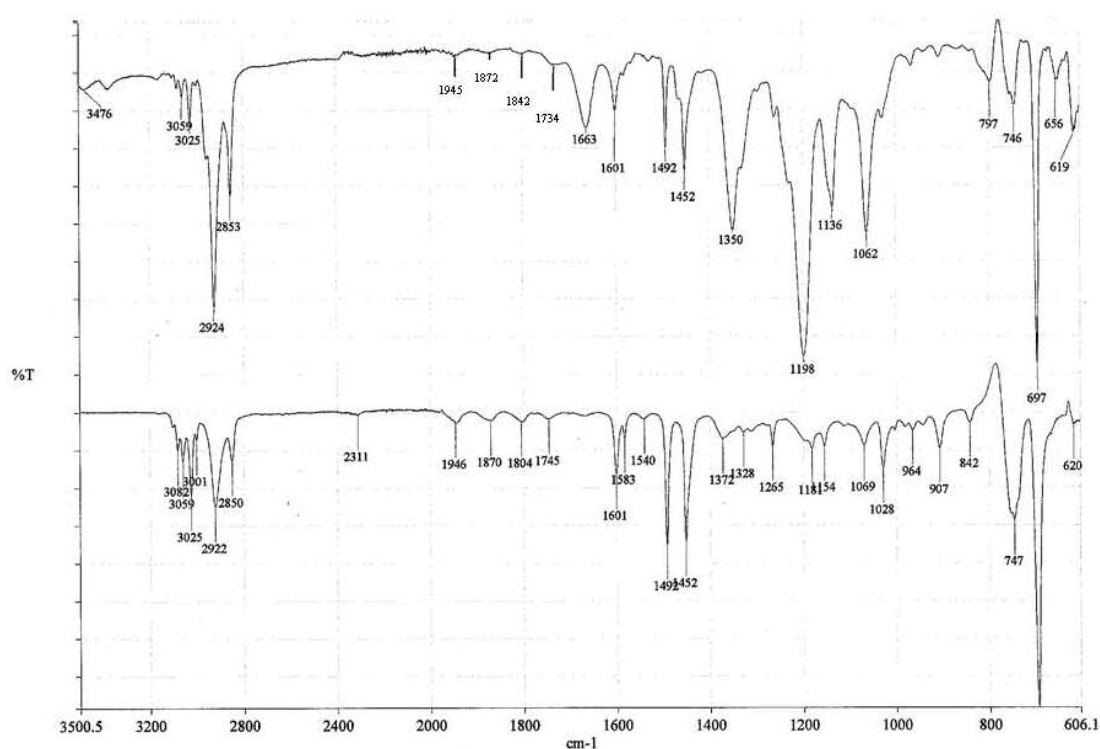

**Figure S4:** IR spectrum of top. extractants of final PVP-Rh-[C<sub>2</sub>OHmim][BF<sub>4</sub>], below. authentic polystyrene (average MW: 280000).

## References

- <sup>1</sup> Mu, X.-d.; Evans, D. G.; Kou, Y. *Catal. Lett.* **2004**, 97, 151.
- <sup>2</sup> Branco, L. C.; Rosa, J. N.; Ramos, J. J. M.; Afonso, C. A. M. *Chem. Eur. J.* **2002**, 8, 3671.
- <sup>3</sup> Dyson, P. J.; Laurenczy, G.; Ohlin, C. A.; Welton, J. T. *Chem. Commun.* **2003**, 2418.
